# Supplementary material for: Teachers’ professional identity: a multifactorial study in basic education institutions in metropolitan Lima
Source: Frontiers journal article supplement (doi:10.3389/feduc.2024.1456759), 2024-12-11
Supplement: Data_Sheet_1.docx [file Data_Sheet_1.docx]

Supplementary Material

# Supplementary Data

Questionnaire on determinants of professional teaching identity

Dear teacher, below are a number of options for each statement. Please check only one answer per statement.

1. Gender

Male ( ) Female ( )

1. Age

_

1. Family burden

Yes ( ) No ( )

1. Marital status

Single ( ) Married ( ) Cohabitant ( ) Separated ( ) Divorced ( ) Widowed ( )

1. Type of contract

Hired by RxH ( ) Hired on payroll ( ) Appointed ( )

1. Service time

1 - 7 years ( ) 8 - 15 years old ( ) 16 - 23 years ( )

1. Type of EI

State ( ) Private ( ) Agreement ( )

1. Remuneration

≤ s/1025 ( ) s/1026 - s/2600 ( ) s/2600 < ( )

1. The educational institution conducts training to strengthen its performance.

Never ( ) Sometimes ( ) Always ( )

1. Level of study

Bachelor's Degree ( ) Master's Degree ( ) PhD ( )

1. Type of education

Education institute ( ) Private university ( ) State university ( )

1. Pre-professional practice courses

2 courses ( ) 3 to 4 courses ( ) 5 or more courses ( )

# Supplementary Figures and Tables

## Supplementary Tables

**Table 1.** Description of the levels of the teacher professional identity variable and its dimensions.

| Levels | Low | | Regular | | High | | Total | |
| --- | --- | --- | --- | --- | --- | --- | --- | --- |
| f | % | f | % | f | % | f | % |
| Teacher professional identity | 5 | 0.9 | 205 | 40.2 | 300 | 58.9 | 510 | 100 |
| Dimension 1: Personal | 10 | 1.9 | 200 | 39.3 | 300 | 58.8 | 510 | 100 |
| Dimension 2: Professional | 5 | 0.9 | 200 | 39.3 | 305 | 59.8 | 510 | 100 |
| Dimension 3: Situational | 53 | 10.3 | 233 | 45.8 | 224 | 43.9 | 510 | 100 |

**Table 2.** Pseudo R-squared

| Cox y Snell | 0,398 |
| --- | --- |
| Nagelkerke | 0,428 |
| McFadden | 0,371 |

**Table 3.** Parameter estimations

|  | | Estimation | Wald | Sig. |
| --- | --- | --- | --- | --- |
| Threshold | [N_identity = 1] | -22,999 | 189,004 | ,000 |
| [N_identity = 2] | -18,506 | 185,862 | ,000 |
| Location | [Gender=1] | ,235 | ,289 | ,001 |
| [Gender=2] | 0a | . | . |
| [Age=1] | -,778 | ,649 | ,001 |
| [Age=2] | ,499 | ,334 | ,563 |
| [Age=3] | 0a | . | . |
| [Family_burden=1] | ,119 | 1,771 | ,183 |
| [Family_burden=2] | ,499 | ,334 | ,003 |
| [Civil_status=1] | -19,157 | 343,823 | ,000 |
| [Civil_status=2] | -18,914 | 376,456 | ,000 |
| [Civil_status=3] | -17,970 | 228,091 | ,000 |
| [Civil_status=4] | -17,805 | 250,565 | ,000 |
| [Civil_status=5] | -18,948 | . | . |
| [Civil_status=6] | 0a | . | . |

Link function: Logit.

a. This parameter is set to zero because it is redundant.

**Table 4.** Pseudo R-squared

| Cox y Snell | 0,371 |
| --- | --- |
| Nagelkerke | 0,444 |
| McFadden | 0,330 |

**Table 5.** Parameter estimations

|  | | Estimation | Wald | Sig. |
| --- | --- | --- | --- | --- |
| Threshold | [N_identity = 1] | -7,525 | 27,680 | ,000 |
| [N_identity = 2] | -2,774 | 8,795 | ,003 |
| Location | [Contract_type=1] | ,396 | ,175 | ,006 |
| [Contract_type=2] | ,851 | 1,720 | ,190 |
| [Contract_type=3] | 0a | . | . |
| [Service_time=1] | -1,865 | 7,055 | ,008 |
| [Service_time=2] | -1,413 | 4,543 | ,033 |
| [Service_time=3] | 0a | . | . |
| [Type_ie., =1] | ,583 | ,175 | ,001 |
| [Remuneration=1] | -2,327 | ,655 | ,018 |
| [Remuneration=2] | -,576 | 1,364 | ,243 |
| [Remuneration=3] | 0a | . | . |
| [Training=1] | -2,634 | 6,365 | ,012 |
| [Training=2] | -1,805 | 3,995 | ,046 |
| [Training=3] | 0a | . | . |

Link function: Logit.

a. This parameter is set to zero because it is redundant.

**Table 6.** Pseudo R-squared

| Cox y Snell | 0,087 |
| --- | --- |
| Nagelkerke | 0,114 |
| McFadden | 0,030 |

**Table 7.** Parameter estimations

|  | | Estimation | Wald | Sig. |
| --- | --- | --- | --- | --- |
| Threshold | [N_identity = 1] | -3,782 | 5,736 | ,605 |
| [N_identity = 2] | ,658 | ,268 | ,017 |
| Location | [Study_level=1] | ,590 | ,225 | ,005 |
| [Study_level=2] | 1,692 | 1,776 | ,183 |
| Study_level=3] | 0a | . | . |
| [Training_Center=1] | ,713 | 2,287 | ,130 |
| [Training_Center=2] | ,599 | 1,084 | ,008 |
| [Training_Center =3] | 0a | . | . |
| [PPP_course=1] | -,318 | ,336 | ,562 |
| [PPP_course=2] | -,326 | ,326 | ,568 |
| [PPP_course=3] | -,116 | ,236 | ,010 |

Link function: Logit.

a. This parameter is set to zero because it is redundant.

**Table 8.** Pseudo R-squared

| Cox y Snell | 0,501 |
| --- | --- |
| Nagelkerke | 0,510 |
| McFadden | 0,468 |

**Table 9.** Parameter estimations.

|  | | Estimation | Wald | Sig. |
| --- | --- | --- | --- | --- |
| Threshold | [N_identity = 1] | -23,891 | 65,681 | ,000 |
| [N_identity = 2] | -18,513 | 44,055 | ,000 |
| Location | [Gender=1] | ,153 | ,077 | ,781 |
| [Gender=2] | 0a | . | . |
| [Age=1] | -,032 | ,001 | ,002 |
| [Age=2] | 1,599 | 2,234 | ,135 |
| [Age=3] | 0a | . | . |
| [Family_burden=1] | 0a | . | . |
| [Family_burden=2] | 1,454 | 3,090 | ,079 |
| [Civil_status=1] | -19,373 | 222,021 | ,000 |
| [Civil_status=2] | -18,466 | 226,333 | ,000 |
| [Civil_status=3] | -17,140 | 125,514 | ,000 |
| [Civil_status=4] | -16,794 | 139,063 | ,000 |
| [Civil_status=5] | -18,825 | . | . |
| [Civil_status=6] | 0a | . | . |
| [Contract_type=1] | ,158 | ,018 | ,003 |
| [Contract_type=2] | 1,245 | 2,503 | ,114 |
| [Contract_type=3] | 0a | . | . |
| [Service_time=1] | -1,936 | 4,139 | ,042 |
| [Service_time=2] | -1,635 | 4,144 | ,042 |
| [Service_time=3] | 0a | . | . |
| [Type_ie., =1] | ,201 | ,643 | ,041 |
| [Remuneration=1] | -2,024 | ,378 | ,539 |
| [Remuneration=2] | -,150 | ,060 | ,807 |
| [Remuneration=3] | 0a | . | . |
| [Training=1] | -3,461 | 8,562 | ,003 |
| [Training=2] | -2,243 | 4,853 | ,028 |
| [Training=3] | 0a | . | . |
| [Study_level=1] | -,195 | ,017 | ,897 |
| [Study_level=2] | 1,001 | ,391 | ,532 |
| [Study_level=3] | 0a | . | . |
| [Training_Center=1] | 1,393 | 3,291 | ,070 |
| [Training_Center=2] | 1,769 | 7,498 | ,006 |
| [Training_Center=3] | 0a | . | . |
| [PPP_course=1] | ,409 | ,356 | ,551 |
| [PPP_course=2] | ,207 | ,083 | ,774 |
| [PPP_course=3] | ,107 | ,033 | ,004 |
